# Supplementary material for: Personalized prognostic prediction tool for high-grade neuroendocrine cervical cancer: a SEER database analysis and single-center validation
Source: Springer Nature journal article supplement (doi:10.1007/s00432-023-05414-6), 2023-10-18

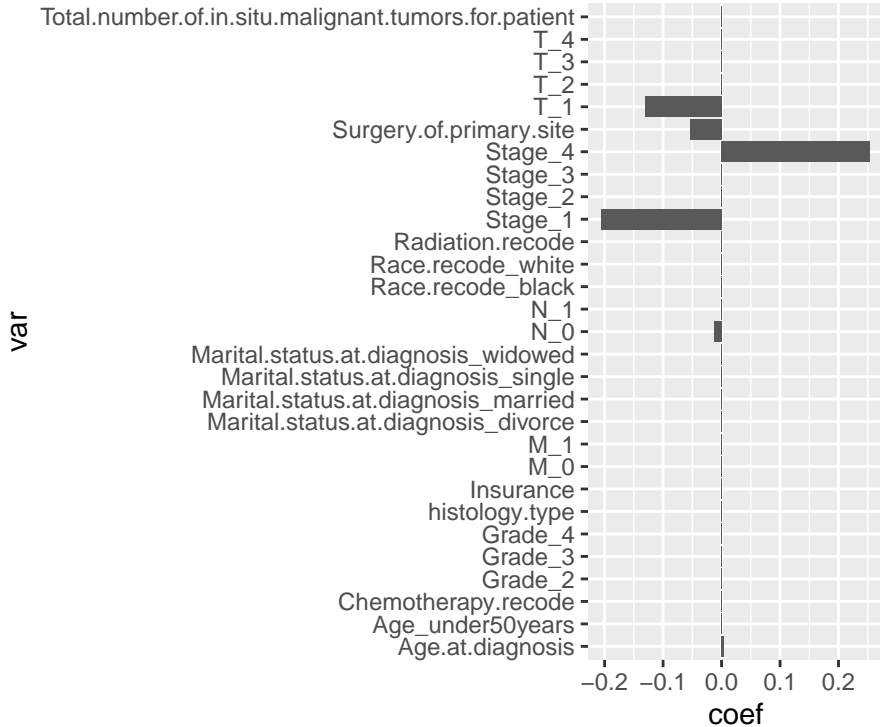

Supplement: MOESM1 [file 26195654]
